# Supplementary material for: Identification of miR-671-5p and Its Related Pathways as General Mechanisms of Both Form-Deprivation and Lens-Induced Myopia in Mice
Source: MDPI journal article supplement (doi:10.3390/cimb45030132), 2023-03-02
Supplement: s1 [file s1]

### **Supplementary Figure S1**

The overview of the protein-protein interaction (PPI) network analysis of the overlapping genes. The 584 genes were input into the STRING database, and achieved a PPI network of 214 nodes and 428 edges. The nodes represent the query proteins, and the edges represent protein-protein associations. The color of the nodes was proportional to the number of degrees. The darker the node's color was, the more multi-functional the protein was.
